# Supplementary material for: Real-Time Epidemic Monitoring and Forecasting of H1N1-2009 Using Influenza-Like Illness from General Practice and Family Doctor Clinics in Singapore
Source: PLoS One. 2010 Apr 14;5(4):e10036. doi: 10.1371/journal.pone.0010036 (PMC2854682; doi:10.1371/journal.pone.0010036)
Supplement: Figure S1 — Data collection form. (0.01 MB PDF) [file pone.0010036.s001.pdf]

**Clinic Stamp:**

Fax form to 62581527 or email this file to jimmy\_ong@ttsh.com.sg.

[illegible]
